# Supplementary material for: Endocytosis in the axon initial segment maintains neuronal polarity
Source: PubMed Central journal article supplement (PMC9433327; doi:10.1038/s41586-022-05074-5), 2022-08-17
Supplement: 41586_2022_5074_MOESM2_ESM.pdf [file 41586_2022_5074_MOESM2_ESM.pdf]

## Reporting Summary

Nature Research wishes to improve the reproducibility of the work that we publish. This form provides structure for consistency and transparency in reporting. For further information on Nature Research policies, see our [Editorial Policies](#) and the [Editorial Policy Checklist](#).

### Statistics

For all statistical analyses, confirm that the following items are present in the figure legend, table legend, main text, or Methods section.

n/a Confirmed

- The exact sample size ( $n$ ) for each experimental group/condition, given as a discrete number and unit of measurement
- A statement on whether measurements were taken from distinct samples or whether the same sample was measured repeatedly
- The statistical test(s) used AND whether they are one- or two-sided  
*Only common tests should be described solely by name; describe more complex techniques in the Methods section.*
- A description of all covariates tested
- A description of any assumptions or corrections, such as tests of normality and adjustment for multiple comparisons
- A full description of the statistical parameters including central tendency (e.g. means) or other basic estimates (e.g. regression coefficient) AND variation (e.g. standard deviation) or associated estimates of uncertainty (e.g. confidence intervals)
- For null hypothesis testing, the test statistic (e.g.  $F$ ,  $t$ ,  $r$ ) with confidence intervals, effect sizes, degrees of freedom and  $P$  value noted  
*Give  $P$  values as exact values whenever suitable.*
- For Bayesian analysis, information on the choice of priors and Markov chain Monte Carlo settings
- For hierarchical and complex designs, identification of the appropriate level for tests and full reporting of outcomes
- Estimates of effect sizes (e.g. Cohen's  $d$ , Pearson's  $r$ ), indicating how they were calculated

*Our web collection on [statistics for biologists](#) contains articles on many of the points above.*

### Software and code

Policy information about [availability of computer code](#)

Data collection 3i Slidebook v6 and MetaMorph versions 7.8.4.0, 7.8.12.0 and 7.10.3.279 were used to collect microscopy images.

Data analysis GraphPad Prism v8 was used for statistical analyses. Fiji (ImageJ) v.2.1.0 and MATLAB 2018a and R2018b were used for image analysis. Custom MATLAB code used for analysis was previously published and publicly available ([https://www.mathworks.com/matlabcentral/fileexchange/72744-scission\\_analysis](https://www.mathworks.com/matlabcentral/fileexchange/72744-scission_analysis)). Biacore X100 Evaluation software version 2.0.2 to analyze sensorgrams.

For manuscripts utilizing custom algorithms or software that are central to the research but not yet described in published literature, software must be made available to editors and reviewers. We strongly encourage code deposition in a community repository (e.g. GitHub). See the Nature Research [guidelines for submitting code & software](#) for further information.

### Data

Policy information about [availability of data](#)

All manuscripts must include a [data availability statement](#). This statement should provide the following information, where applicable:

- Accession codes, unique identifiers, or web links for publicly available datasets
- A list of figures that have associated raw data
- A description of any restrictions on data availability

All data generated or analyzed during this study are included in this published article (and its supplementary information files).

## Field-specific reporting

Please select the one below that is the best fit for your research. If you are not sure, read the appropriate sections before making your selection.

Life sciences       Behavioural & social sciences       Ecological, evolutionary & environmental sciences

For a reference copy of the document with all sections, see [nature.com/documents/nr-reporting-summary-flat.pdf](https://www.nature.com/documents/nr-reporting-summary-flat.pdf)

## Life sciences study design

All studies must disclose on these points even when the disclosure is negative.

|                 |                                                                                                                                                                                                                                                                                                                                                                                                                                                                                                                                                                                                                                                                                               |
|-----------------|-----------------------------------------------------------------------------------------------------------------------------------------------------------------------------------------------------------------------------------------------------------------------------------------------------------------------------------------------------------------------------------------------------------------------------------------------------------------------------------------------------------------------------------------------------------------------------------------------------------------------------------------------------------------------------------------------|
| Sample size     | No power analyses were used to predetermine the number of animals. Suitable sample sizes were determined based on previous experience and based on published literature in the field. 9-30 animals or cells were used for each condition. All sample sizes are specified in figures and legends (individual dots represent independent biological replicates, figure legends and/or methods).                                                                                                                                                                                                                                                                                                 |
| Data exclusions | No data were excluded                                                                                                                                                                                                                                                                                                                                                                                                                                                                                                                                                                                                                                                                         |
| Replication     | Biological replicates are defined as distinct animals for <i>C. elegans</i> experiments or distinct neurons for cell culture experiments. All <i>C. elegans</i> in vivo microscopy measurements were repeated in at least two independent imaging sessions. All vertebrate neuron experiments were from at least 3 independent neuronal cultures and at least three independent imaging experiment sessions. All attempts at replication were successful. Experiments with in vitro purified proteins were not repeated due to the scale of the experiments and resulting resource requirements and because in vitro results were independently verified with subsequent in vivo experiments. |
| Randomization   | Randomization was not necessary for these experiments. Experiments were performed based on genotype/treatment, and animals/neurons were not further separated into experimental sub-groups requiring randomization.                                                                                                                                                                                                                                                                                                                                                                                                                                                                           |
| Blinding        | Investigators were blinded to the genotype of animals for all behavioral assays. Otherwise, experiments were not blinded because mutant/treatment phenotypes were easily observable and did not effectively allow for this.                                                                                                                                                                                                                                                                                                                                                                                                                                                                   |

## Reporting for specific materials, systems and methods

We require information from authors about some types of materials, experimental systems and methods used in many studies. Here, indicate whether each material, system or method listed is relevant to your study. If you are not sure if a list item applies to your research, read the appropriate section before selecting a response.

### Materials & experimental systems

| n/a                                 | Involved in the study                                           |
|-------------------------------------|-----------------------------------------------------------------|
| <input type="checkbox"/>            | <input checked="" type="checkbox"/> Antibodies                  |
| <input type="checkbox"/>            | <input checked="" type="checkbox"/> Eukaryotic cell lines       |
| <input checked="" type="checkbox"/> | <input type="checkbox"/> Palaeontology and archaeology          |
| <input type="checkbox"/>            | <input checked="" type="checkbox"/> Animals and other organisms |
| <input checked="" type="checkbox"/> | <input type="checkbox"/> Human research participants            |
| <input checked="" type="checkbox"/> | <input type="checkbox"/> Clinical data                          |
| <input checked="" type="checkbox"/> | <input type="checkbox"/> Dual use research of concern           |

### Methods

| n/a                                 | Involved in the study                           |
|-------------------------------------|-------------------------------------------------|
| <input checked="" type="checkbox"/> | <input type="checkbox"/> ChIP-seq               |
| <input checked="" type="checkbox"/> | <input type="checkbox"/> Flow cytometry         |
| <input checked="" type="checkbox"/> | <input type="checkbox"/> MRI-based neuroimaging |

## Antibodies

### Antibodies used

chicken polyclonal anti-MAP2, Abcam, Cat# ab5392  
 rabbit polyclonal anti-MAP2 Abcam Cat# ab32454  
 goat polyclonal anti-MAP2A/B EnCor Biotech Cat # GPCA-MAP2A/B  
 mouse anti-ankyrinG (clone N106/36) Sigma Cat# MABN466  
 Ankyrin G Polyclonal rabbit purified antibody Synaptic Systems Cat# 386 003  
 Polyclonal Guinea pig purified antibody Ankyrin G Synaptic Systems Cat# 386 005  
 rabbit polyclonal anti-clathrin heavy chain Abcam Cat# ab21679  
 goat polyclonal anti-AP-2 complex subunit alpha-1 Abcam Cat# ab189995  
 mouse anti-alpha adaptin monoclonal antibody (clone AP6) Thermo Cat# MA1-064  
 recombinant anti-RAB-7 antibody [EPR7589] Abcam Cat# ab137029  
 IHC-plus™ Polyclonal Goat anti-Mouse RAB7A / RAB7 Antibody, LSBio Cat# LS-B13237-100  
 sheep polyclonal anti-TGN46 (human) BioRad Cat# AHP500G  
 chicken polyclonal anti-beta III tubulin Abcam Cat# ab41489  
 mouse anti-L1CAM (clone UJ127.11) Sigma Cat# L4543  
 Anti-TfR antibody (clone H68.4) Thermo Fisher Scientific Cat #13-6800, RRID AB\_2533029  
 goat polyclonal anti-transferrin receptor Thermo Fisher Cat# A80-128A  
 rabbit anti-glutamate receptor 1 antibody, Sigma Cat# AB1504

rabbit anti-FLAG antibody Millipore Sigma Cat# F7425  
 rabbit polyclonal anti-Goat IgG (H+L), Alexa Fluor 488 Thermo Fisher Cat# A27012  
 donkey polyclonal anti-mouse IgG (H+L) Alexa Fluor Plus 488 Thermo Fisher Cat# A32766  
 goat polyclonal anti-chicken IgY (H+L) Alexa Fluor 555 Thermo Fisher Cat# A21437  
 donkey polyclonal anti-goat IgG (H+L) Alexa Fluor Plus 555 Thermo Fisher Cat# A32816  
 THE™ His Tag Antibody [iFluor 488], mAb, Mouse, GenScript Cat# A01800  
 goat polyclonal anti-rabbit IgG (H+L) Alexa Fluor 555 Thermo Fisher Cat# A27039  
 donkey polyclonal anti-sheep IgG (H+L) Alexa Fluor 555 Thermo Fisher Cat# A21436  
 goat polyclonal anti-chicken IgY (H+L) Alexa Fluor 647 Thermo Fisher Cat# A21449  
 goat polyclonal anti-rabbit IgG (H+L) Alexa Fluor 647 Thermo Fisher Cat# A32733  
 DyLight™ 405 AffiniPure Donkey Anti-Chicken IgY (IgG) (H+L) Jackson Cat# 703-475-155  
 DyLight™ 405 AffiniPure Donkey Anti-Mouse IgG (H+L) Jackson Cat# 715-475-151  
 Alexa Fluor® 488 AffiniPure Donkey Anti-Rabbit IgG (H+L) Jackson Cat# 711-545-152  
 Alexa Fluor® 488 AffiniPure Donkey Anti-Goat IgG (H+L) Jackson Cat# 705-545-147  
 Alexa Fluor® 594 AffiniPure Donkey Anti-Rabbit IgG (H+L) Jackson Cat# 711-585-152  
 Alexa Fluor® 647 AffiniPure Donkey Anti-Mouse IgG (H+L) Jackson Cat# 715-605-151  
 Alexa Fluor® 647 AffiniPure Donkey Anti-Chicken IgY (IgG) (H+L) Jackson Cat# 703-605-155  
 Alexa Fluor® 647 AffiniPure Donkey Anti-Guinea Pig IgG (H+L) Jackson Cat# 706-605-148  
 Donkey anti-Goat IgG (H+L) Highly Cross-Adsorbed Secondary Antibody, Alexa Fluor Plus 647 Thermo Cat# A32849  
 Monoclonal mouse anti-Neurofascin antibody Antibodies Incorporated Cat # 75-172  
 chicken polyclonal anti-mScarlet antibody Synaptic Systems Cat #409006  
 anti-Mouse Alexa568 conjugate, Thermo Fisher Scientific, A11004, RRID AB\_2534072  
 Alexa Fluor 568 Donkey Anti-mouse IgG (H+L) Thermo Fisher Scientific Cat# A10037  
 Alexa Fluor 594 conjugate anti-chicken antibody Thermo Fisher Scientific Cat# A11042  
 Alexa Fluor 647 conjugated anti-mouse antibody Thermo Fisher Scientific Cat# A21235

## Validation

All antibodies used are standard commercial antibodies and validated by the respective manufacturer. No custom antibodies that required validation were generated.

## Eukaryotic cell lines

Policy information about [cell lines](#)

## Cell line source(s)

Male human embryonic stem cells (ESCs) line H1: WiCell Research Institute, Inc. (WA01)  
 Human embryonic kidney (HEK) 293T cells: ATCC (CRL-11268)  
 S2 cells: Drosophila Genome Resource Center, Bloomington, Indiana  
 High Five cells: Laboratory of K. Christopher Garcia, Stanford University

## Authentication

ESCs line H1 were authenticated by GTW banding karyotype method, and only cells with normal 46, XY karyotype were used for experiments. HEK293T were authenticated by ATCC using STR. S2 and High Five cells were not authenticated as they were only used for purified protein production and secretion, which was confirmed successful.

## Mycoplasma contamination

Mycoplasma contamination has been tested and confirmed negative for all cell lines used in this study.

Commonly misidentified lines  
(See [ICLAC](#) register)

No commonly misidentified lines used.

## Animals and other organisms

Policy information about [studies involving animals](#); [ARRIVE guidelines](#) recommended for reporting animal research

## Laboratory animals

N2 Bristol strain *Caenorhabditis elegans* were used. L4 hermaphrodites were used for imaging and behavioral analysis. Males and hermaphrodites were used to generate new strains via crossing.  
 Time pregnant Sprague-Dawley rats (Janvier Labs) were housed with ad libitum feeding at 18–22 °C ambient temperature with 50–70% humidity, and a 12 hour light-dark cycle. Every effort was made to minimize the number of animals used and their suffering. Embryonic day 18 rat embryos were used to prepare rat primary neuronal cultures.  
 Newborn (postnatal day 2) male and female wild type CD1 mice (Charles River, Cat#22) were used for induced human neuron experiments. Mice were housed at room temperature (68-72 degrees Fahrenheit) with 30-70% humidity, and a 12 hour light-dark cycle.  
 C57BL/6J mice were housed at room temperature and 40-60% humidity with a 12 hour light-dark cycle with free access to food and water ad libitum. Hippocampi were dissected from P0 neonatal male and female wild-type mice. All procedures complied with the animal care standards set forth by the National Institutes of Health (NIH) and were approved by the Stanford University Administrative Panel on Laboratory Animal Care.

## Wild animals

No wild animals used.

## Field-collected samples

No field-collected samples used.

## Ethics oversight

All experiments requiring mice were approved by the administrative panel on laboratory animal care (APLAC, Stanford University). All procedures for experiments involving rats were in accordance with the European guide for the care and use of laboratory animals and approved by the ethics committee of Bordeaux University (CE50) and the French Ministry of Research.

Note that full information on the approval of the study protocol must also be provided in the manuscript.
